# Supplementary material for: Risk calculator of the clinical response to antihistamines in chronic urticaria: Development and internal validation
Source: PubMed Central journal article supplement (PMC10889609; doi:10.1371/journal.pone.0295791), 2024-02-23
Supplement: pone.0295791.s001.pdf [file pone.0295791.s001.pdf]

TRIPOD Checklist: Prediction Model Development and Validation

| Section/Topic                | Item | Checklist Item | Page                                                                                                                                                                                                    |
|------------------------------|------|----------------|---------------------------------------------------------------------------------------------------------------------------------------------------------------------------------------------------------|
| <b>Title and abstract</b>    |      |                |                                                                                                                                                                                                         |
| Title                        | 1    | D;V            | Identify the study as developing and/or validating a multivariable prediction model, the target population, and the outcome to be predicted. ✓                                                          |
| Abstract                     | 2    | D;V            | Provide a summary of objectives, study design, setting, participants, sample size, predictors, outcome, statistical analysis, results, and conclusions. ✓                                               |
| <b>Introduction</b>          |      |                |                                                                                                                                                                                                         |
| Background and objectives    | 3a   | D;V            | Explain the medical context (including whether diagnostic or prognostic) and rationale for developing or validating the multivariable prediction model, including references to existing models. ✓      |
|                              | 3b   | D;V            | Specify the objectives, including whether the study describes the development or validation of the model or both. ✓                                                                                     |
| <b>Methods</b>               |      |                |                                                                                                                                                                                                         |
| Source of data               | 4a   | D;V            | Describe the study design or source of data (e.g., randomized trial, cohort, or registry data), separately for the development and validation data sets, if applicable. ✓                               |
|                              | 4b   | D;V            | Specify the key study dates, including start of accrual; end of accrual; and, if applicable, end of follow-up. ✓                                                                                        |
| Participants                 | 5a   | D;V            | Specify key elements of the study setting (e.g., primary care, secondary care, general population) including number and location of centres. ✓                                                          |
|                              | 5b   | D;V            | Describe eligibility criteria for participants. ✓                                                                                                                                                       |
|                              | 5c   | D;V            | Give details of treatments received, if relevant. No Apply                                                                                                                                              |
| Outcome                      | 6a   | D;V            | Clearly define the outcome that is predicted by the prediction model, including how and when assessed. ✓                                                                                                |
|                              | 6b   | D;V            | Report any actions to blind assessment of the outcome to be predicted. ✓                                                                                                                                |
| Predictors                   | 7a   | D;V            | Clearly define all predictors used in developing or validating the multivariable prediction model, including how and when they were measured. ✓                                                         |
|                              | 7b   | D;V            | Report any actions to blind assessment of predictors for the outcome and other predictors. ✓                                                                                                            |
| Sample size                  | 8    | D;V            | Explain how the study size was arrived at. ✓                                                                                                                                                            |
| Missing data                 | 9    | D;V            | Describe how missing data were handled (e.g., complete-case analysis, single imputation, multiple imputation) with details of any imputation method. ✓                                                  |
| Statistical analysis methods | 10a  | D              | Describe how predictors were handled in the analyses. ✓                                                                                                                                                 |
|                              | 10b  | D              | Specify type of model, all model-building procedures (including any predictor selection), and method for internal validation. ✓                                                                         |
|                              | 10c  | V              | For validation, describe how the predictions were calculated. ✓                                                                                                                                         |
|                              | 10d  | D;V            | Specify all measures used to assess model performance and, if relevant, to compare multiple models. ✓                                                                                                   |
|                              | 10e  | V              | Describe any model updating (e.g., recalibration) arising from the validation, if done. No apply                                                                                                        |
| Risk groups                  | 11   | D;V            | Provide details on how risk groups were created, if done. No apply                                                                                                                                      |
| Development vs. validation   | 12   | V              | For validation, identify any differences from the development data in setting, eligibility criteria, outcome, and predictors. No apply                                                                  |
| <b>Results</b>               |      |                |                                                                                                                                                                                                         |
| Participants                 | 13a  | D;V            | Describe the flow of participants through the study, including the number of participants with and without the outcome and, if applicable, a summary of the follow-up time. A diagram may be helpful. ✓ |
|                              | 13b  | D;V            | Describe the characteristics of the participants (basic demographics, clinical features, available predictors), including the number of participants with missing data for predictors and outcome. ✓    |
|                              | 13c  | V              | For validation, show a comparison with the development data of the distribution of important variables (demographics, predictors and outcome). ✓                                                        |
| Model development            | 14a  | D              | Specify the number of participants and outcome events in each analysis. ✓                                                                                                                               |
|                              | 14b  | D              | If done, report the unadjusted association between each candidate predictor and outcome. No apply                                                                                                       |
| Model specification          | 15a  | D              | Present the full prediction model to allow predictions for individuals (i.e., all regression coefficients, and model intercept or baseline survival at a given time point). ✓                           |
|                              | 15b  | D              | Explain how to use the prediction model. ✓                                                                                                                                                              |
| Model performance            | 16   | D;V            | Report performance measures (with CIs) for the prediction model. ✓                                                                                                                                      |
| Model-updating               | 17   | V              | If done, report the results from any model updating (i.e., model specification, model performance). No apply                                                                                            |
| <b>Discussion</b>            |      |                |                                                                                                                                                                                                         |
| Limitations                  | 18   | D;V            | Discuss any limitations of the study (such as nonrepresentative sample, few events per predictor, missing data). ✓                                                                                      |
| Interpretation               | 19a  | V              | For validation, discuss the results with reference to performance in the development data, and any other validation data. ✓                                                                             |
|                              | 19b  | D;V            | Give an overall interpretation of the results, considering objectives, limitations, results from similar studies, and other relevant evidence. ✓                                                        |
| Implications                 | 20   | D;V            | Discuss the potential clinical use of the model and implications for future research. ✓                                                                                                                 |
| <b>Other information</b>     |      |                |                                                                                                                                                                                                         |
| Supplementary information    | 21   | D;V            | Provide information about the availability of supplementary resources, such as study protocol, Web calculator, and data sets. ✓                                                                         |
| Funding                      | 22   | D;V            | Give the source of funding and the role of the funders for the present study. ✓                                                                                                                         |

\*Items relevant only to the development of a prediction model are denoted by D, items relating solely to a validation of a prediction model are denoted by V, and items relating to both are denoted D;V. We recommend using the TRIPOD Checklist in conjunction with the TRIPOD Explanation and Elaboration document.
